# Supplementary material for: Expression and gene regulation network of RBM8A in hepatocellular carcinoma based on data mining
Source: publisher site journal article supplement (doi:10.18632/aging.101749), 2019-01-22
Supplement: Supplementary file [file aging-v11i2-101749-supplementary-material-SD1.pdf]

## SUPPLEMENTARY MATERIALS

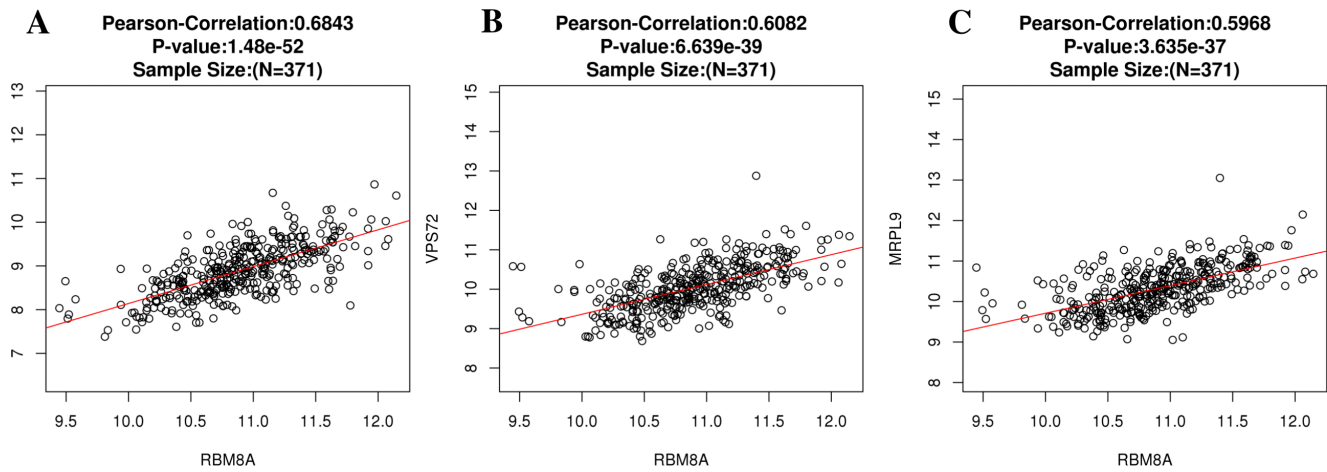

**Supplementary Figure 1. Gene expression correlation analysis for *RBM8A*, *POLR3C*, *VPS72*, and *MRPL9* (LinkedOmics).** The scatter plot shows Pearson correlation of *RBM8A* expression with expression of *POLR3C* (A), *VPS72* (B), and *MRPL9* (C).

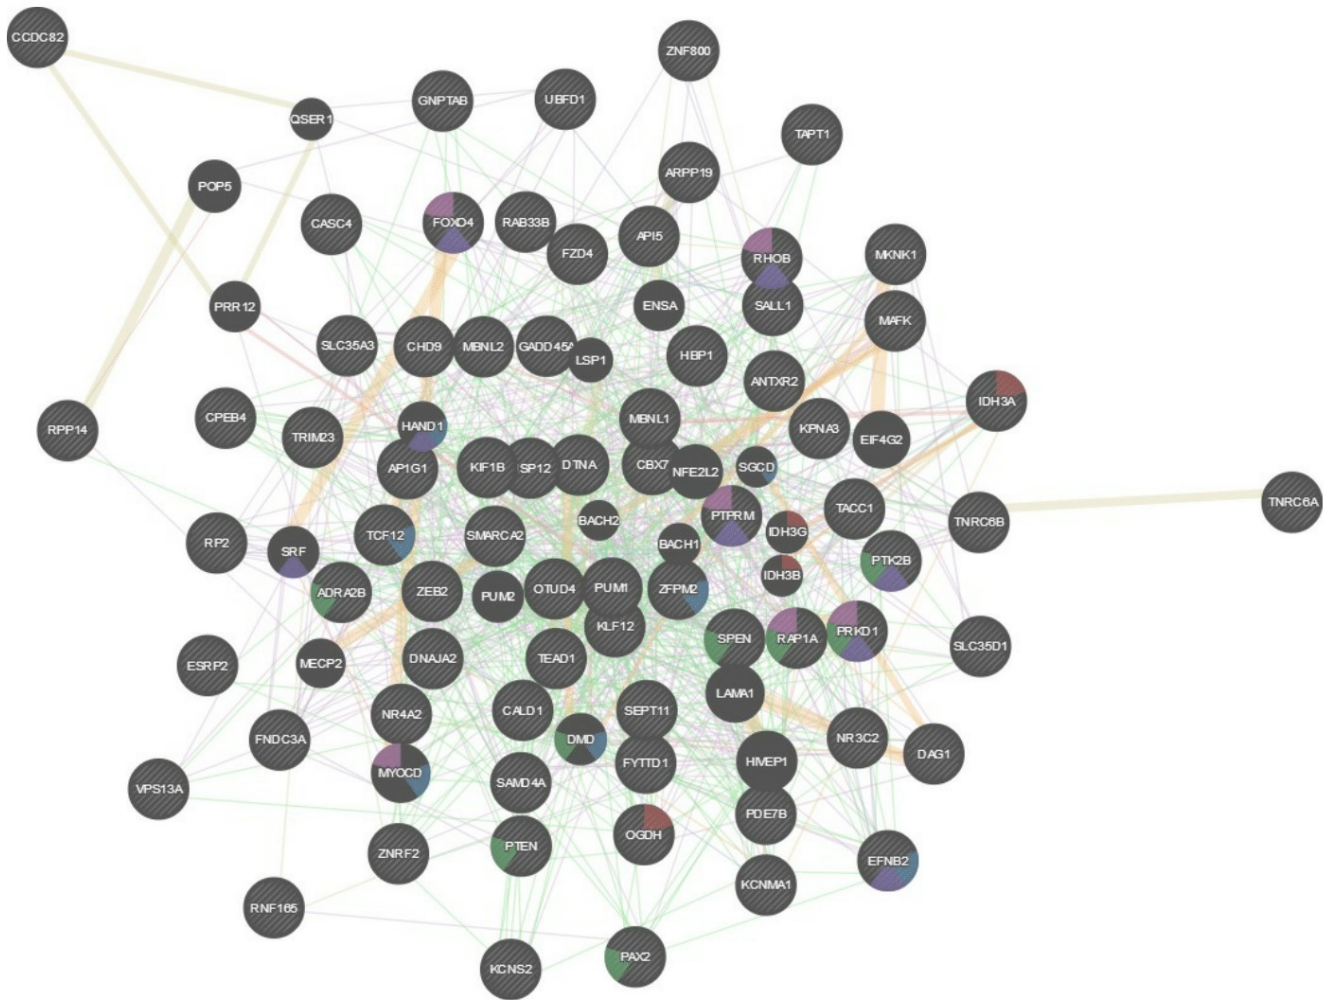

### Networks

- Co-expression
- Predicted
- Co-localization
- Shared protein domains
- Physical Interactions
- Pathway
- Genetic Interactions

### Functions

- tricarboxylic acid cycle
- muscle organ development
- angiogenesis
- regulation of nervous system development
- regulation of vasculature development

**Supplementary Figure 2. Protein-protein interaction network of miRNA 527-target networks (GeneMANIA).** Protein-protein interaction (PPI) network and functional analysis indicating the gene set that was enriched in the target networks of miRNA 527. Different colors of the network edge indicate the bioinformatics methods applied: co-expression, website prediction, co-localization, shared protein domains, physical interaction, pathway and genetic interactions. The different colors for the network nodes indicate the biological functions of the set of enrichment genes.

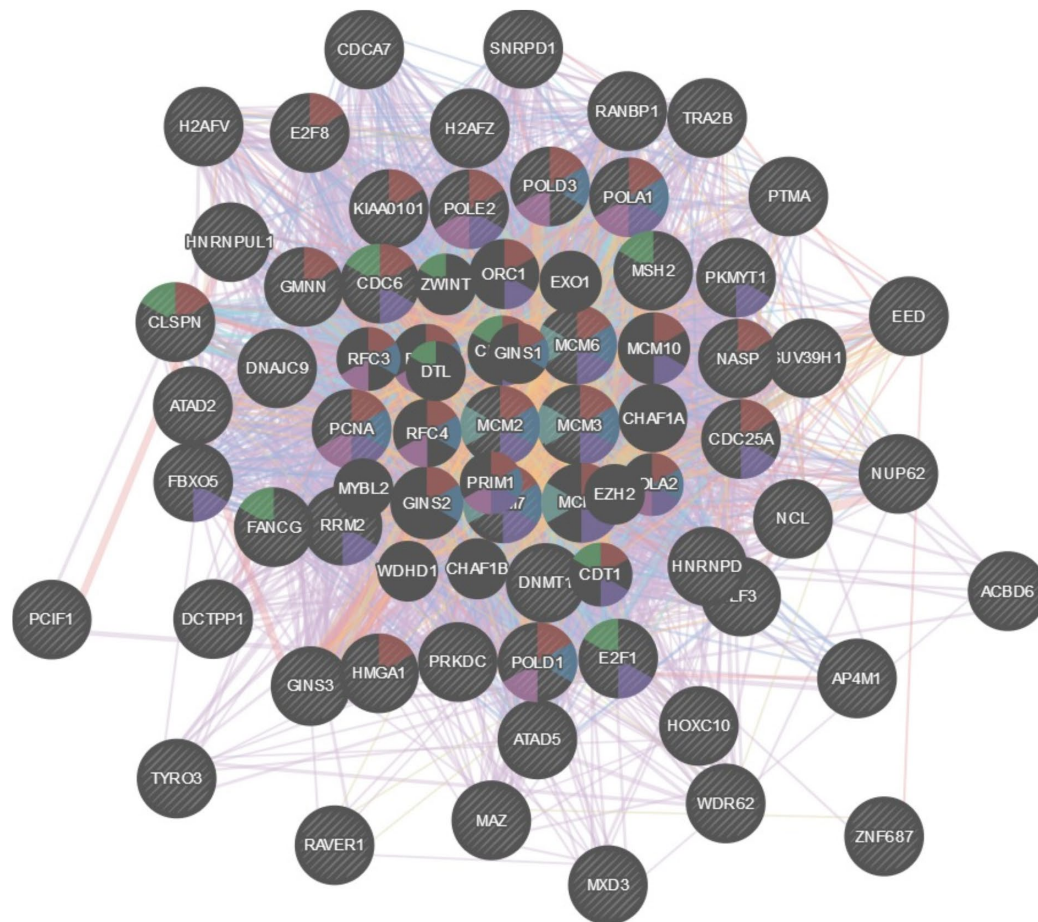

### Networks

- Co-expression
- Physical Interactions
- Co-localization
- Predicted
- Pathway
- Shared protein domains

### Functions

- DNA replication
- DNA strand elongation involved in DNA replication
- G1/S transition of mitotic cell cycle
- telomere maintenance
- MCM complex
- cell cycle checkpoint

**Supplementary Figure 3. Protein-protein interaction network of transcription factor E2F1DP1RB-target networks (GeneMANIA).** Protein-protein interaction (PPI) network and functional analysis indicating the gene set that was enriched in the target networks of transcription factor E2F1DP1RB. Different colors of the network edge indicate the bioinformatics methods applied: co-expression, physical interaction, co-localization, website prediction, pathway and shared protein domains. The different colors for the network nodes indicate the biological functions of the set of enrichment genes.

**Supplementary Table 1. Significantly enriched GO annotations (cellular components) of *RBM8A* in hepatocellular carcinoma (LinkedOmics).**

| Description          | Leading EdgeNum | FDR | leadingEdgeGene                                                                                                                                                                                                                                                                                                                                                                                                                                                                                                                                                                                                                                                                                                            |
|----------------------|-----------------|-----|----------------------------------------------------------------------------------------------------------------------------------------------------------------------------------------------------------------------------------------------------------------------------------------------------------------------------------------------------------------------------------------------------------------------------------------------------------------------------------------------------------------------------------------------------------------------------------------------------------------------------------------------------------------------------------------------------------------------------|
| condensed chromosome | 86              | 0   | SMC4;AKAP8;NDC80;CDX2;CENPA;CENPB;SMC2;SPAG5;CENPE;CENPF;KIF2C;RCC1;TOPBP1;CHEK1;ZWINT;DMC1;DCTN3;CDCA5;CBX3;HUS1B;SPC24;DDX11;CENPV;FANCD2;SKA1;SKA3;NCAPH;ITGB3BP;PES1;NSL1;SMC1B;H2AFX;HMGB1;HMGB2;BIRC5;INCENP;CENPW;MAD2L1;MKI67;NEK2;DYNC1LI1;PLK1;ERCC6L;PPP1CC;ZWILCH;HJURP;NUP133;SPC25;RAD1;RAD9A;RAD51;RAD51C;RANGAP1;BLM;CENPK;NCAPG;CENPH;BRCA1;AURKA;SUV39H1;BUB1;BUB1B;TOP2A;TUBG1;UBE2I;ZNF207;CENPM;NUP37;CENPO;NUP85;DSN1;SEH1L;NUF2;MAD1L1;DCTN5;BANF1;CCNB1;TOP3B;RSPH1;BOD1;BUB3;AURKB;H2AFY;KNTC1;CKAP5;NCAPD2                                                                                                                                                                                       |
| replication fork     | 30              | 0   | POLD3;CHEK1;DNMT1;POLA2;UHRF1;H2AFX;MCM3;SMARCAL1;PCNA;GINS2;POLE3;POLA1;POLD1;POLE2;TIPIN;MCM10;PRIM1;PRIM2;RAD51C;RFC2;RFC4;RFC5;RPA1;RPA3;XPA;XRCC2;XRCC3;PIF1;CDC45;GINS4                                                                                                                                                                                                                                                                                                                                                                                                                                                                                                                                              |
| spliceosomal complex | 68              | 0   | SF3B4;CWC27;ADAR;PIIH;USP39;TXNL4A;SF3A3;SF3B2;LSM6;U2AF2;HNRNPA1L2;DQX1;U2AF1L4;HNRNPA3;RALY;SNW1;TFIP11;PRPF6;PRPF31;LSM3;RBMX;HNRNPA1;HNRNPA2B1;HNRNPC;HNRNPH1;HNRNPH3;HNRNPU;MAGOH;HNRNPM;CRNKL1;RBMX2;PPIL1;LSM7;GPATC H1;MAGOHB;PRCC;RBM22;XAB2;LSM2;SNRNP70;SNRPA;SNRPA1;SNRPB;SNRPB2;SNRPC;SNRPD1;SNRPD2;SNRPD3;SNRPE;SNRPF;SNRPG;SF1;RNF113A;SF3A2;DGCR14;SF3B5;WDR83;DHX16;PRPF38A;RBM17;SART1;PRPF4;PRPF3;EFTUD2;SNRNP40;DDX23;EIF4A3;RBM8A                                                                                                                                                                                                                                                                     |
| spindle              | 112             | 0   | KIF20A;TACC3;SPAG5;CENPE;CENPF;TUBGCP2;JTB;CBX1;TOPBP1;KATNA1;BIRC8;DCTN3;CBX3;HAUS1;CLTA;CSNK1D;KIF18B;CKAP2L;DCTN1;DDX11;ECT2;CENPV;ERCC2;SKA1;SKA3;MAPRE1;TPX2;HAUS5;NUP62;KIF4A;HEPACAM2;POC1A;ASPM;FBXO5;CKAP2;PRPF19;WDR62;RACGAP1;GPSM2;HSPB1;BIRC5;TUBB8;INCENP;KIF2A;KIF11;KIFC1;KIF22;ARL3;MAD2L1;NEK2;NPM1;DYNC1LI1;NUSAP1;PLK1;PPP2R3C;CDCA8;PLEKHG6;MAP1S;HAUS7;YEATS2;CDK5RAP2;RCC2;KIF15;RANGAP1;AGBL5;RPS3;MMS19;AURKA;BUB1B;TPR;TTK;TUBG1;VRK1;ZNF207;ALMS1;HAUS3;SHCBP1;NUP85;DSN1;FAM83D;KIF18A;CAPG;FAM110A;MAD1L1;GSG2;RAB11FIP4;PSRC1;KLHL22;WDR73;DYNLL1;HDAC3;CDC16;CCNB1;RSPH1;PRC1;UNC119;ARHGFE2;AURKB;HAUS8;KIF23;KIF20B;MAD2L1BP;ESPL1;KNTC1;DLGAP5;CKAP5;CDK1;CEP350;CDC6;CDC20;KIF14;CDC25B |

Abbreviations: LeadingEdgeNum, the number of leading edge genes; FDR, false discovery rate from Benjamini and Hochberg from gene set enrichment analysis (GSEA).

**Supplementary Table 2. Significantly enriched GO annotations (biological processes) of *RBM8A* in hepatocellular carcinoma (LinkedOmics).**

| Description                  | Leading EdgeNum | FDR | LeadingEdgeGene                                                                                                                                                                                                                                                                                                                                                                                                                                                                                                                                                                                                                                                                                                                                                                                                                                                                                                                                                                  |
|------------------------------|-----------------|-----|----------------------------------------------------------------------------------------------------------------------------------------------------------------------------------------------------------------------------------------------------------------------------------------------------------------------------------------------------------------------------------------------------------------------------------------------------------------------------------------------------------------------------------------------------------------------------------------------------------------------------------------------------------------------------------------------------------------------------------------------------------------------------------------------------------------------------------------------------------------------------------------------------------------------------------------------------------------------------------|
| cell cycle checkpoint        | 89              | 0   | CDK2;NDRG1;NDC80;MAD2L2;CENPF;TOPBP1;CHEK1;ZWINT;CHEK2;E2F7;CSNK2A1;EME1;E2F1;E2F4;FANCG;CNOT10;HINFP;FBXO4;PRPF19;SFN;H2AFX;HRAS;PRMT1;MAD2L1;MSH2;CNOT3;NPM1;PCNA;DYNC1LI1;WAC;LCMT1;TRIAP1;GTSE1;DTL;UIMC1;PLK1;TIPI N;ZWILCH;RFWD3;FANCI;PRCC;CDK5RAP2;PCID2;CENPJ;PRKDC;BAX;RAD1;RBBP8;RPA2;RPS6;RPS27A;CLSPN;BLM;DCLRE1B;BRCA1;AURKA;BUB1;BUB1B;TFDP2;TOP2A;TTK;UBA52;XRCC3;ZNF207;RNASEH2B;WDR76;CEP63;CDK5RAP3;HMGA2;CDT1;CDC45;GSG2;BRIP1;ATRIP;THOC5;CCNB1;CCNE2;ZNF830;ZW10;BUB3;AURKB;BRE;MAD2L1BP;MDC1;KNTC1;CDK1;CDC5L;CDC6;CDC25C                                                                                                                                                                                                                                                                                                                                                                                                                                 |
| DNA replication              | 100             | 0   | CHAF1A;RNASEH2A;POLD3;POLQ;EHMT2;DBF4;CHEK1;SUPT16H;CHEK2;POLG2;PARP1;E2F7;EME1;ESCO2;DDX11;FEN1;KIN;GTPBP4;POLA2;CACYPB;POLL;STOML2;HMGA1;HRAS;STRA8;LIG1;MCM2;MCM3;MCM4;MCM5;MCM6;MCM7;NAP1L1;NASP;SMARCA1;GMNN;PCNA;DTL;CINP;GINS2;RTEL1;PLA2G1B;POLE3;POLA1;POLD1;POLD2;POLE2;TEX10;TIPIN;PPP2R1A;MCM10;PRIM1;PRIM2;RAD1;RAD9A;RAD51;RBBP7;RFC2;RFC4;RFC5;RPA1;RPA3;RRM1;RRM2;CHTF18;CLSPN;TSPYL2;BLM;SET;SHC1;NUCKS1;GINS3;BRCA1;SSRP1;TOP2A;TTF1;SLBP;DSCC1;E2F8;CDT1;CHAF1B;CDC7;CDC45;ATRIP;RPAIN;ING5;GINS4;MCM8;CCNA2;TIMELESS;CCNE1;EXO1;RECQL4;KIAA0101;CDK1;GINS1;CDC6;CDC25A;CDC25C;THOC1                                                                                                                                                                                                                                                                                                                                                                          |
| mRNA processing              | 149             | 0   | PQBP1;CDK7;SF3B4;CWC27;ADAR;PRMT5;PPIH;PRPF8;KHDRBS1;USP39;CPSF4;TXNL4A;RNPS1;SF3A3;HNRNPA0;SF3B2;CPSF6;HNRNPUL1;LSM6;U2AF2;TSEN15;RAVER1;LSM11;HNRNPA1L2;CSTF1;CSTF2;DQX1;DHX9;U2AF1L4;ERCC2;HNRNPA3;CASC3;PUF60;RALY;NCBP2;SNW1;KIN;PDCD11;KDM1A;JMJD6;TARDBP;TFIP11;PRPF6;FUS;ZNF473;PRPF31;DAZAP1;AKAP8L;GPKOW;LSM3;RBMX;PRPF19;TSEN54;GTF2F1;GTF2H4;CPSF1;HMX2;HNRNPA1;HNRNPA2B1;HNRNPC;HNRNPD;HNRNPH1;HNRNPH3;HNRNPL;HNRNPU;MAGO;HNRNPM;H2AFB1;NONO;GEMIN4;DDX47;CRNKL1;SRRT;RBMX2;PIL1;LSM7;CPSF3;POLR2D;POLR2F;POLR2G;POLR2H;POLR2I;PAF1;GPATCH1;MAGOHB;RAVER2;PSPC1;WDR33;RBM38;RBM22;RNF20;XAB2;PTBP1;LSM2;SCAF1;UBL5;RBM4;SAFB;SFPO;CPSF4L;TRA2B;SNRNP70;SNRPA;SNRPA1;SNRPB;SNRPB2;SNRPC;SNRPD1;SNRPD2;SNRPD3;SNRPE;SNRPF;SNRPG;SUPT5H;SUPT6H;SF1;RNF113A;SLBP;TSEN34;RBM42;GEMIN7;FIP1L1;SF3A2;DGCR14;RBM10;SF3B5;FAM103A1;WDR83;THOC3;SARNP;DHX16;BUD13;PHF5A;PRPF38A;RBM17;THOC5;KHSRP;CCNB1;SART1;PRPF4;PRPF3;EFTUD2;SNRNP40;DDX23;RBM39;SAFB2;EIF4A3;RBM8A;THOC1 |
| fatty acid metabolic process | 133             | 0   | LYPLA1;ACAA2;CES1;PPARGC1A;ACOT2;SLC27A5;SLC27A4;SLC27A2;ERLIN2;CYP2U1;APOA5;ACSM2A;ACOT12;CPT2;CRAT;PTGR2;CYP1A1;CYP1A2;CYP1B1;CYP2A6;CYP2A7;CYP2A13;CYP2C19;CYP2C8;CYP2C9;CYP2J2;CYP4A11;AKR1C2;DECR1;MMAA;DLAT;DLD;ECHS1;EDN1;EHHADH;EPHX2;AKT2;ETFA;ETFDH;FAAH;ACSL1;ALDH3A2;PTGR1;WDT1;LPIN1;ACSL6;SIRT1;MLYCD;AMACR;MTO;HACL1;HIBCH;GHR;ACAD8;ANGPTL3;ZADH2;CYP4V2;ACAA1;HADHB;HADH;ACACB;HSD17B4;ACADL;ACADM;ACSM2B;ACADS;                                                                                                                                                                                                                                                                                                                                                                                                                                                                                                                                                |

| Description | Leading EdgeNum | FDR | LeadingEdgeGene                                                                                                                                                                                                                                                                                                                                                                                                                           |
|-------------|-----------------|-----|-------------------------------------------------------------------------------------------------------------------------------------------------------------------------------------------------------------------------------------------------------------------------------------------------------------------------------------------------------------------------------------------------------------------------------------------|
|             |                 |     | ACADSB;INSIG1;IRS1;ACADVL;IVD;ACAT1;LIPE;LPL;CYP4F3;MGS<br>T2;MUT;MYO5A;PNPLA8;PCCA;ACOX1;CRYL1;ABHD5;INSIG2;HS<br>D17B12;PRKAG2;PDHA1;PDK1;PDK2;PDK4;ACSL5;PEX13;PLA2G5;<br>HAO1;POR;PPARA;AUH;ACSM5;OXSM;PDPR;AVPR1A;THNSL2;EC<br>HDC2;OLAH;PECR;BDH2;BAAT;PDP2;GPAM;ABCD3;ELOVL5;ACS<br>M3;SCP2;ACOT1;ACOT6;STAT5B;TNFRSF1A;ELOVL6;ALDH5A1;A<br>DIPOR2;PDHX;ACAD10;ACOX2;SESN2;LONP2;ACAD11;MCEE;CBR<br>4;CYP4F2;IRS2;CBR1;SGPL1;LPIN2 |

Abbreviations: LeadingEdgeNum, the number of leading edge genes; FDR, false discovery rate from Benjamini and Hochberg from gene set enrichment analysis (GSEA).

**Supplementary Table 3. Significantly enriched GO annotations (molecular functions) of *RBM8A* in hepatocellular carcinoma (LinkedOmics).**

| Description                                              | Leading EdgeNum | FDR | LeadingEdgeGene                                                                                                                                                                                                                                                                                                                                                                                                                                                                                                                                                                                         |
|----------------------------------------------------------|-----------------|-----|---------------------------------------------------------------------------------------------------------------------------------------------------------------------------------------------------------------------------------------------------------------------------------------------------------------------------------------------------------------------------------------------------------------------------------------------------------------------------------------------------------------------------------------------------------------------------------------------------------|
| structural constituent of ribosome                       | 85              | 0   | RPL35;RPL39L;MRPL52;MRPL55;RPL13A;RPL36;RPSA;RPL10A;MRPL4;MRPL51;MRPS17;MRPS23;MRPS21;MRPS18A;MRPL47;RPL5;RPL6;RPL7;RPL7A;RPL8;RPL10;RPL17;RPL18;RPL18A;RPL19;RPL21;RPL22;RPL23A;MRPL23;RPL24;RPL26;RPL27;RPL30;RPL27A;RPL28;RPL31;RPL32;RPL35A;RPL37;RPL37A;RPL38;RPL39;RPL41;RPL36A;RPLP0;RPLP1;RPLP2;MRPS12;RPS2;RPS3;RPS3A;RPS4X;RPS5;RPS6;RPS7;RPS8;RPS9;RPS10;RPS11;RPS12;RPS13;RPS14;RPS15;RPS15A;RPS16;RPS17;RPS18;RPS19;RPS21;RPS23;RPS24;RPS27;RPS27A;RPS29;MRPS14;MRPL14;MRPS24;MRPS5;MRPL11;MRPL9;UBA52;DAP3;MRPL24;RPL23;MRPL33                                                            |
| monooxygenase activity                                   | 37              | 0   | COQ7;CYP2U1;CYP1A1;CYP1A2;CYP1B1;CYP2A6;CYP2A7;CYP2C19;CYP2C8;CYP2J2;CYP3A4;CYP4A11;CYP8B1;CYP11A1;CYP17A1;CYP26A1;DBH;AKR1C2;NLRP11;FMO2;FMO3;FMO4;CYP4X1;CYP4A22;CYP4V2;CYP4F3;NOS1;NOS3;PAH;COQ6;CYP39A1;MICAL3;CYP4F11;CYP3A43;CYP4F2;CYP7B1;MICAL2                                                                                                                                                                                                                                                                                                                                                 |
| oxidoreductase activity, acting on CH-OH group of donors | 63              | 0   | AKR1A1;ME3;HIBADH;ADH1A;ADH1B;ADH1C;ADH4;ADH5;ADH6;ADHFE1;PTGR2;CYB5A;AKR1C1;AKR1C2;EHHADH;LDHD;ALDH3A1;ALDH3A2;PTGR1;AKR7A3;KDSR;GPD1;ZADH2;HADHB;HADH;AOX1;HSD11B1;HSD17B3;HSD17B4;IDH1;IDH2;IDH3A;CYP4F3;MDH1;ME1;CRYL1;RDH11;HSD17B12;HSD17B11;DCXR;HAO1;CHDH;BDH2;RDH14;RDH5;BDH1;SORD;SRD5A2;D2HGDH;XDH;KCNA1;VKORC1;L2HGDH;GLYR1;CBR4;KCNA2;CYP4F2;RDH16;HSD17B6;CBR1;DHR3;GRHPR;H6PD                                                                                                                                                                                                            |
| cofactor binding                                         | 105             | 0   | AHCYL1;ME3;SDS;HIBADH;PROSC;ADH4;CRY2;CRYM;CRYZ;CTH;DECR1;DHODH;CYB5R3;DLD;ABAT;LDHD;ETFA;ALAS1;ETFDH;ALDH1A3;FMO2;FMO3;FMO4;AHCYL2;SIRT5;SIRT1;NNT;MMACHC;HACL1;ACAD8;GCLC;GOT2;GPD1;GPT;HADH;HDC;AOC2;HMGCL;ACADL;GADL1;ACADM;IDH1;IDH3A;ACADS;ACADSB;ACADVL;IVD;ACAT1;IYD;LMO2;MAOB;ME1;ALDH6A1;NOS1;NOS3;OGDH;ACOX1;COQ6;CRYL1;AADAT;CSAD;WVOX;HAO1;POR;PNPO;THNSL2;ASPDH;DHTKD1;OGDHL;BDH2;MICAL3;QDPR;SCP2;SRR;SDHA;SDHB;SDHD;SHMT1;AGXT2;SORD;SRD5A1;SUOX;TAT;D2HGDH;XDH;KCNA1;VKORC1;ACBD4;THNSL1;COQ10B;ACAD10;ACOX2;ACAD11;GLYR1;ACCS;CAT;GPT2;CBR4;AOC3;SGPL1;ACBD5;OXNAD1;GRHPR;H6PD;MICAL2 |

Abbreviations: LeadingEdgeNum, the number of leading edge genes; FDR, false discovery rate from Benjamini and Hochberg from gene set enrichment analysis (GSEA).

**Supplementary Table 4. Significantly enriched KEGG pathway annotations of *RBM8A* in hepatocellular carcinoma (LinkedOmics).**

| Description               | Leading EdgeNum | FDR | LeadingEdgeGene                                                                                                                                                                                                                                                                                                                                                                                                                                                                                    |
|---------------------------|-----------------|-----|----------------------------------------------------------------------------------------------------------------------------------------------------------------------------------------------------------------------------------------------------------------------------------------------------------------------------------------------------------------------------------------------------------------------------------------------------------------------------------------------------|
| Spliceosome               | 62              | 0   | PQBP1;SF3B4;PPIH;USP39;TXNL4A;SF3A3;SF3B2;LSM6;U2AF2;HNRNPA1L2;U2AF1L4;HNRNPA3;PUF60;NCBP2;SNW1;PRPF6;PRPF31;LSM3;RBMX;HNRNPA1;HNRNPC;HNRNPU;HSPA6;MAGOH;HNRNPM;CRNKL1;PPIL1;LSM7;MAGOHB;RBM22;XAB2;ISY1;LSM2;RP9;TRA2B;SNRNP70;SNRPA;SNRPA1;SNRPB;SNRPB2;SNRPC;SNRPD1;SNRPD2;SNRPD3;SNRPE;SNRPF;SNRPG;U2AF1;SF3A2;SF3B5;THOC3;DHX16;PRPF38A;RBM17;SART1;PRPF4;PRPF3;EFTUD2;SNRNP40;DXDX23;EIF4A3;RBM8A                                                                                            |
| Ribosome                  | 79              | 0   | RPL35;RPL13A;RPL36;RPSA;RPL10A;MRPL4;MRPS17;MRPS21;MRPS18A;RPL5;RPL6;RPL7;RPL7A;RPL8;RPL10;RPL17;RPL18;RPL18A;RPL19;RPL21;RPL22;RPL23A;MRPL23;RPL24;RPL26;RPL27;RPL30;RPL27A;RPL28;RPL31;RPL32;RPL35A;RPL37;RPL37A;RPL38;RPL39;RPL41;RPL36A;RPLP0;RPLP1;RPLP2;MRPS12;RPS2;RPS3;RPS3A;RPS4X;RPS5;RPS6;RPS7;RPS8;RPS9;RPS10;RPS11;RPS12;RPS13;RPS14;RPS15;RPS15A;RPS16;RPS17;RPS18;RPS19;RPS21;RPS23;RPS24;RPS25;RPS26;RPS27;RPS27A;RPS29;MRPS14;MRPL14;MRPS5;MRPL11;MRPL9;UBA52;MRPL24;RPL23;MRPL33 |
| DNA replication           | 24              | 0   | RNASEH2A;POLD3;FEN1;POLA2;LIG1;MCM2;MCM3;MCM4;MCM5;MCM6;MCM7;PCNA;POLE3;POLA1;POLD1;POLE2;PRIM1;PRIM2;RFC2;RFC4;RFC5;RPA1;RPA3;RNASEH2B                                                                                                                                                                                                                                                                                                                                                            |
| Cell cycle                | 51              | 0   | CDK4;CDK7;CDKN2C;PTTG2;DBF4;YWHAQ;CHEK1;CHEK2;E2F1;E2F2;E2F4;CDC26;SMC1B;ANAPC4;HDAC1;HDAC2;MAD2L1;MCM2;MCM3;MCM4;MCM5;MCM6;MCM7;PCNA;ANAPC5;ANAPC7;ANAPC11;PLK1;PRKDC;BUB1;BUB1B;TFDP2;TTK;CDC7;CDC45;CDC16;CCNA2;CCNB1;CCNE1;PKMYT1;CCNB2;CCNE2;BUB3;PTTG1;ESPL1;CDK1;CDC6;CDC20;CDC25A;CDC25B;CDC25C                                                                                                                                                                                            |
| RNA transport             | 50              | 0   | POM121C;POP7;PRMT5;TACC3;RPP30;RPP38;POP4;RNPS1;EIF2B1;EIF2S3;EIF4A1;CASC3;NCBP2;NUP205;NUP210;NUP188;NUP62;NXT1;MAGOH;GEMIN4;MAGOHB;ELAC1;NUP133;XPO5;RAN;RANGAP1;UPF3A;SUMO2;TPR;UBE2I;NUP37;GEMIN7;RPP21;NUP85;NUP214;THOC3;RAE1;THOC5;EIF3B;EIF3D;EIF3F;EIF3G;EIF2B5;EIF2S2;EIF4E2;NUP155;NUP93;EIF4A3;RBM8A;THOC1                                                                                                                                                                             |
| mRNA surveillance pathway | 29              | 0   | CPSF4;RNPS1;CPSF6;MSI2;CSTF1;CSTF2;CSTF3;CASC3;NCBP2;SMG5;DAZAP1;NXT1;CPSF1;MAGOH;MSI1;CPSF3;PPP1CA;PPP1CC;PPP2R3C;MAGOHB;PPP2R1A;PPP2R5D;WDR33;UPF3A;FIP1L1;SYMPK;EIF4A3;SMG7;RBM8A                                                                                                                                                                                                                                                                                                               |

Abbreviations: LeadingEdgeNum, the number of leading edge genes; FDR, false discovery rate from Benjamini and Hochberg from gene set enrichment analysis (GSEA).



**Supplementary Table 5. Significantly enriched kinase-target networks of *RBM8A* in hepatocellular carcinoma (LinkedOmics).**

| <b>Geneset</b> | <b>LeadingEdgeGene</b>                                                                                                                                                                                                                                                                                                                                                                                                                                                                                                                                                                                                                                                                  |
|----------------|-----------------------------------------------------------------------------------------------------------------------------------------------------------------------------------------------------------------------------------------------------------------------------------------------------------------------------------------------------------------------------------------------------------------------------------------------------------------------------------------------------------------------------------------------------------------------------------------------------------------------------------------------------------------------------------------|
| Kinase_ATR     | DBF4;CHEK1;CHEK2;DAXX;E2F1;EWSR1;FANCD2;FARSA;H2AFX;MCM2;MCM3;CNOT2;SMARCAL1;GINS2;FANCI;TDP1;RAD1;RAD9A;CHTF18;CLSPN;BLM;DCLRE1C;MARCKSL1;BRCA1;XPA;XRCC3;ATRIP;MDC1                                                                                                                                                                                                                                                                                                                                                                                                                                                                                                                   |
| Kinase_AURKB   | NDC80;RBM14;MYBBP1A;CENPA;KIF2C;SUPT16H;CDCA5;HIST2H3C;CDCA2;KIF4A;ATXN10;CKAP2;RBMX;RACGAP1;H3F3A;HMGN2;BIRC5;HSP90AB1;MKI67;NUSAP1;PLK1;CDCA8;PRKDC;PARD3;RBM3;RPL8;RPL21;RPS10;DEK;SHCBP1;DSN1;HIST1H3C;AURKB;KIF23                                                                                                                                                                                                                                                                                                                                                                                                                                                                  |
| Kinase_CDK1    | BCL2L11;CDK7;SCML2;CENPA;SPAG5;PTTG2;SEPT9;CD3EAP;KIF2C;CHEK1;CDCA5;U2AF2;CSNK2A1;CSNK2B;DCTN1;DNMT1;E2F1;ECT2;EEF1D;EZH2;FANCG;FEN1;TPX2;FOXM1;CARHSP1;CKAP2;FBXO43;UHRF1;TFPT;PYCR2;ANAPC4;HIST1H1E;HCFC1;HMGA1;BIRC5;FOXK2;KIF11;KIF22;STMN1;LBR;LIG1;LMNA;LMNB1;MCM7;MDM4;MKI67;NCL;NUSAP1;DTL;ANAPC11;PI4KB;ERCC6L;PPP1CA;CEP55;PBK;NSFL1C;PTPN2;RAD9A;RANGAP1;RFC2;RFC4;RFC5;RPS3;RRM2;BLM;NCAPG;NUCKS1;BRCA1;SSR1;SUPT5H;TCOF1;BUB1;BUB1B;TK1;TMPO;TOP2A;TPR;UBE2I;USP1;SLBP;CDC7;GSG2;LMNB2;GMPS;CDC16;CCNB1;PRC1;KIF20B;ESPL1;DLGAP5;UBAP2L;CDC20;CDC25A;CDC25B;CDC25C                                                                                                         |
| Kinase_CDK2    | CDK7;SCML2;CDX2;CENPF;CHD4;HNRNPUL1;CHEK1;EGLN2;C17orf49;CSNK2A1;CSNK2B;DNMT1;E2F1;E2F2;CRTC2;EZH2;RALY;SNW1;TPX2;FOXM1;ANKLE2;NCAPH;SNAPIN;CDC26;XRCC6;MTHFD1L;PRPF31;ERAL1;PELP1;POLL;DBNL;UHRF1;GTF2F1;PYCR2;ANAPC4;HIST1H1E;HCFC1;HMGA1;HNRNPD;HNRNPH1;FOXK2;ILF3;IMPDH2;KIF22;STMN1;LIG1;LIG3;MARCKS;MCM2;MCM3;MCM4;MCM7;MKI67;MYBL2;NCL;NOSIP;CDK16;ANAPC5;ANAPC7;DTL;ANAPC11;POU2F1;PPP1CA;C9orf40;NUP133;DMAP1;PTHLH;AARS2;USP37;PTPN2;PYCR1;RAD9A;DPF2;RPS3;RPS27;RRM2;TSPYL2;BLM;NUCKS1;SNRNP70;BRCA1;SUPT5H;SUPT6H;TBCE;TCF3;TCOF1;TK1;TPR;TSN;XRCC1;ZYX;CDT1;DIAPH3;CDC7;ATRIP;ING5;LMNB2;ARHGAP19;GMPS;CDC16;CCNA2;CCNE1;PRPF3;MDC1;EIF4A3;DLGAP5;SETDB1;CDC6;CDC20;CDC25C |
| Kinase_CHEK1   | TRIM28;RBM14;MYBBP1A;POP4;TLK2;CHEK1;RAVER1;CSNK2B;E2F6;EPRS;FANCD2;FANCE;FEN1;RALY;RRP12;XRCC6;RACGAP1;H3F3A;HNRNPA2B1;KIFC1;KPNA2;LAMC1;LIG1;LMNA;MAD2L1;MCM3;MCM5;MDM4;MKI67;HNRNPM;PPP2R5D;MAP2K2;RAD51;RPL19;CLSPN;BLM;RBM42;BUD13;TNK1;PRPF3;ARHGEF2;AURKB;MDC1;CDK1;CDC25A;CDC25B;CDC25C                                                                                                                                                                                                                                                                                                                                                                                         |

Abbreviations: LeadingEdgeNum, the number of leading edge genes; FDR, false discovery rate from Benjamini and Hochberg from gene set enrichment analysis (GSEA).

**Supplementary Table 6. Significantly enriched miRNA-target networks of *RBM8A* in hepatocellular carcinoma (LinkedOmics).**

| Geneset                                                    | LeadingEdgeGene                                                                                                                                                                                                                                                                                                                                                                                                                                                                                                                                           |
|------------------------------------------------------------|-----------------------------------------------------------------------------------------------------------------------------------------------------------------------------------------------------------------------------------------------------------------------------------------------------------------------------------------------------------------------------------------------------------------------------------------------------------------------------------------------------------------------------------------------------------|
| CTTTGCA,<br>MIR-527                                        | MBNL2;DNAJA2;ARPP19;RPP14;KLF12;CASC4;ANTXR2;ADRA2B;DAG1;AP1G1;GADD45A;ZNF800;DTNA;EFNB2;TAPT1;PTK2B;USP12;ZNF2;FNDC3A;SPEN;SAMD4A;KIF1B;TNRC6B;SLC35D1;VPS13A;ZFPM2;SLC35A3;CBX7;HBP1;PDE7B;TNRC6A;IDH3A;TRIM23;KCNMA1;KCNS2;KPNA3;RHOB;MBNL1;FOXO4;NR3C2;NR4A2;RNF165;OGDH;PAX2;OTUD4;SEPT11;PRKD1;UBFD1;PTEN;PTPRM;RAP1A;RP2;SALL1;SMARCA2;TACC1;TCF12;TEAD1;GNPTAB;MAFK;CCDC82;CALD1;ESRP2;CHD9;CPEB4;FZD4;RAB33B;FYTTD1;API5;MKNK1;PUM1;ZEB2                                                                                                         |
| CCCACAT,<br>MIR-299-3P                                     | APBB3;CUX1;AP1G1;CYB5R3;MAPRE3;FBXO33;IFIT1;ITGAV;KCNMA1;MUC4;PARP6;ZNF1;ARRDC3;RAB6A;ABCE1;PDLIM2;TCF4;TIMP3;UBE2H;TRPM3;RAB6C;RUNX1T1;CD164                                                                                                                                                                                                                                                                                                                                                                                                             |
| GTGCAAT,<br>MIR-25, MIR-32,<br>MIR-92, MIR-363,<br>MIR-367 | FRY;TOB1;ADAM10;NFAT5;IQGAP2;FCHO2;LIN54;CPEB2;ADM;SESN3;CNTN4;DMXL1;S1PR1;PIKFYVE;FHL2;CPEB3;GOLGA8A;PHLPP2;PDZD2;DOCK9;MORC3;NECAP1;LATS2;NPTN;GOLGA4;GRIA3;BAZ2B;HIVEP1;RBPM2;INSIG1;ITGAV;MYO18A;SMAD6;MAN2A1;DNAJB9;MYO1B;NFIA;NFI;POLK;C11orf24;SLC38A2;OTUD4;BSDC1;UBE2W;FBXW7;PRKCE;ADAMTSL3;FAM160B1;REV3L;GPBP1L1;BMPR2;GRAMD3;SSFA2;TCF21;DYNLT3;TEAD1;TGIF1;UGP2;LUZP1;PPCS;CPEB4;SGPP1;SNN;DNAJC30;GLYR1;PIK3R3;CBFA2T3;KAT2B;CCNC;HERC2;KALRN;ARRDC4;DLGAP2;FNIP1;KIAA0430;EDEM1;ZEB2;TECPR2                                                |
| GACAATC,<br>MIR-219                                        | PTPRU;PPARGC1A;AKAP13;FMNL2;SLC31A1;CPEB2;SH3D19;FAM91A1;ZNF800;UBR1;ELK1;EPA4;ERG;ESR1;ZCCHC24;RBM24;CPEB3;KIF1B;DDAH1;ELMOD2;CCDC28A;FBXO3;AFF4;INSIG1;SNRK;CC2D1A;SOX6;AGPAT3;ERGIC1;RNF6;ITSN1;FBXL17;TACC1;KLF9;TGFB2;NR2C2;UBE3A;SLC30A4;NRIP1;FZD4;TRAF7;KBTBD8;CGNL1;CBFA2T3;CD164;SYNGAP1;HOMER2;LAPTM4A;TSC22D2                                                                                                                                                                                                                                 |
| ACTTTAT,<br>MIR-142-5P                                     | APBB3;SORBS1;NFAT5;BVES;MGAT4B;FCHO2;CLCN3;C14orf28;COL4A3;CPEB2;FAM91A1;AP1G1;MIER3;AHR;UBR1;ELAVL2;EPAS1;HIPK1;ETV1;JMJD1C;CPEB3;FNDC3A;SPEN;DCUN1D4;TBC1D9;ZCCHC14;ZFPM2;RHOQ;FOS;RALGAP1;C2CD2;GCH1;NPAS4;AFF4;MAT2B;NRG1;CHSY3;LUZP2;IGF1;MKLN1;NFE2L2;RNF165;CDK17;MBIP;BTBD1;FAM134B;OTUD4;DNAJC25;CDC37L1;SLC17A7;GOPC;PTPN4;REV3L;SCOC;SDCBP;SNX16;ABCG4;PLEKHA3;BNIP2;TCF12;TGFB2;KLF10;TLE4;ZFP36;ZFYVE21;RNF128;SPSB1;CHD9;CPEB4;FAM107B;ZNF503;RERG;DCHS1;SLC4A4;NRP1;SYNJ1;CCNT2;ZBTB47;TAOK2;UBE4A;SLC25A27;ADAMTSL1;UBE3C;HERPUD1;TSC22D2 |

Abbreviations: LeadingEdgeNum, the number of leading edge genes; FDR, false discovery rate from Benjamini and Hochberg from gene set enrichment analysis (GSEA).

**Supplementary Table 7. Significantly enriched transcription factor-target networks of *RBM8A* in hepatocellular carcinoma (LinkedOmics).**

| Geneset         | LeadingEdgeGene                                                                                                                                                                                                                                                                                                                                                                                                                                                                                              |
|-----------------|--------------------------------------------------------------------------------------------------------------------------------------------------------------------------------------------------------------------------------------------------------------------------------------------------------------------------------------------------------------------------------------------------------------------------------------------------------------------------------------------------------------|
| V\$E2F1DP1RB_01 | POLD3;HNRNPUL1;CLTA;SEZ6;RAVER1;E2F7;ZNF565;DNMT1;E2F1;EIF4A1;THAP8;EZH2;DNAJC9;ZIM2;NUP62;POLA2;INTS7;IL4I1;FBXO5;WDR62;ATAD2;H2AFZ;HMGN2;HNRNPA1;HNRNPD;HOXC10;RBPJ;ILF3;IMPDH2;STMN1;LIG1;MAZ;MCM2;MCM3;MCM6;MCM7;MSH2;NASP;NCL;GMNN;APH1A;PCNA;TRMT6;POLA1;POLD1;POLE2;ANKHD1;PPP1CC;OTUD7B;ZNF687;USP37;RAD51;RRM2;CLSPN;GINS3;SNRPD1;SOAT1;TMPO;TYRO3;DCTPP1;E2F8;ATAD5;CDT1;MXD3;CDCA7;ACBD6;MCM8;FIZ1;EED;PKMYT1;AP4M1;KIAA0101;ARHGAP11A;CDK1;CDC6;CDC25A                                           |
| V\$E2F1DP1_01   | POLD3;CD3EAP;HNRNPUL1;CBX3;RAVER1;E2F7;ZNF565;DNMT1;E2F1;EIF4A1;THAP8;EZH2;FANCD2;FANCG;DNAJC9;ZIM2;NUP62;IL4I1;FBXO5;WDR62;ATAD2;H2AFZ;HMGA1;HNRNPA2B1;HNRNPD;HOXC10;ILF3;STMN1;MAZ;MCM2;MCM3;MCM4;MCM6;MCM7;MSH2;NASP;NCL;PAX6;GMNN;APH1A;PCNA;TRMT6;POLA1;POLD1;POLE2;PRKDC;OTUD7B;PTMA;ZNF687;USP37;RANBP1;RRM2;PCIF1;CLSPN;TRA2B;GINS3;GPBP1;SNRPD1;SOAT1;SUV39H1;TMPO;TYRO3;DCTPP1;E2F8;ATAD5;MXD3;CDCA7;ACBD6;MCM8;PHF5A;FIZ1;EED;PKMYT1;AP4M1;H2AFV;KIAA0101;ARHGAP11A;CDK1;CDC6;CDC25A              |
| V\$E2F1DP2_01   | POLD3;CD3EAP;HNRNPUL1;CBX3;RAVER1;E2F7;ZNF565;DNMT1;E2F1;EIF4A1;THAP8;EZH2;FANCD2;FANCG;DNAJC9;ZIM2;NUP62;IL4I1;FBXO5;WDR62;ATAD2;H2AFZ;HMGA1;HNRNPA2B1;HNRNPD;HOXC10;ILF3;STMN1;MAZ;MCM2;MCM3;MCM4;MCM6;MCM7;MSH2;NASP;NCL;PAX6;GMNN;APH1A;PCNA;TRMT6;POLA1;POLD1;POLE2;PRKDC;OTUD7B;PTMA;ZNF687;USP37;RANBP1;RRM2;PCIF1;CLSPN;TRA2B;GINS3;GPBP1;SNRPD1;SOAT1;SUV39H1;TMPO;TYRO3;DCTPP1;E2F8;ATAD5;MXD3;CDCA7;ACBD6;MCM8;PHF5A;FIZ1;EED;PKMYT1;AP4M1;H2AFV;KIAA0101;ARHGAP11A;CDK1;CDC6;CDC25A              |
| V\$E2F1_Q3      | POLD3;PLK4;CD3EAP;HNRNPUL1;RAVER1;E2F7;SIX5;ZNF565;DNMT1;E2F1;THAP8;EZH2;DOLK;DNAJC9;ZIM2;NUP62;IL4I1;FBXO5;PELP1;WDR62;GPS2;ATAD2;H2AFZ;HMGN2;HNRNPD;HOXC10;ILF3;STMN1;MAZ;MCM2;MCM3;MCM6;MCM7;MSH2;NASP;NCL;CNOT3;PAX6;GMNN;APH1A;PCNA;TRMT6;POLA1;POLD1;POLE2;ANKHD1;TIPIN;OTUD7B;KIF15;ZNF687;USP37;RRM2;CLSPN;GINS3;SNRPD1;SOAT1;TMPO;TYRO3;USP1;DCTPP1;E2F8;ATAD5;MXD3;CDCA7;ACBD6;MCM8;FIZ1;PRPF38A;EED;PKMYT1;AP4M1;KIAA0101;ARHGAP11A;CDK1;CDC6;CDC25A                                              |
| V\$E2F1_Q4_01   | DDX17;SMC2;YWHAQ;TOPBP1;PAQR4;NDUFA11;ZNF565;CTNND2;DAXX;SASS6;DNMT1;E2F1;THAP8;EZH2;FANCG;DOLK;RALY;PPRC1;POLA2;INTS7;FBXO5;EIF3K;WDR62;ATAD2;H2AFZ;HMGN2;HMGA1;HNRNPA1;HNRNPD;HOXA9;HOXC10;RBPJ;IMPDH2;STMN1;MAT2A;MAZ;MCM2;MCM3;MCM4;MCM6;MCM7;NASP;NCL;GMNN;PCNA;TRMT6;ATP5G2;POLA1;POLE2;ANKHD1;PRKDC;OTUD7B;PTMA;ZNF687;RAD51;RANBP1;RPS19;GINS3;BMP7;SUV39H1;KLF5;UFD1L;USP1;DCTPP1;E2F8;CDC45;MXD3;CASP2;CDCA7;UXT;ACBD6;MCM8;HIST1H2AH;PKMYT1;AP4M1;NUP155;KIAA0101;ARHGAP11A;CDK1;MELK;CDC6;CDC25A |

Abbreviations: LeadingEdgeNum, the number of leading edge genes; FDR, false discovery rate from Benjamini and Hochberg from gene set enrichment analysis (GSEA). V\$, the annotation found in Molecular Signatures Database (MSigDB) for transcription factors (TF).
